# Supplementary material for: Hierarchical carbon nanopetal/polypyrrole nanocomposite electrodes with brush-like architecture for supercapacitors
Source: Royal Society of Chemistry journal article supplement (doi:10.1039/c6cp00150e), 2016-01-01
Supplement: c6cp00150e1.pdf [file c6cp00150e1.pdf]

# Hierarchical carbon nanopetal/polypyrrole nanocomposite electrodes with brush-like architecture for supercapacitors

Jayesh Cherusseri<sup>a</sup> and Kamal K. Kar<sup>a,b\*</sup>

<sup>a</sup>Advanced Nanoengineering Materials Laboratory, Materials Science Programme, Indian Institute of Technology, Kanpur, Uttar Pradesh-208016, India.

<sup>b</sup>Advanced Nanoengineering Materials Laboratory Department of Mechanical Engineering, Indian Institute of Technology, Kanpur, Uttar Pradesh-208016, India.

\*Corresponding Author. Tel: +91-512-2597687, E-mail: kamalkk@iitk.ac.in (Kamal K. Kar)

## Electronic Supplementary Information

### Supplementary Methods:

**Method S1.** Calculation of ionic conductivity of CNPCF-PPY nanocomposite electrodes.

**Method S2.** Calculation of the cell capacitance of CNPCF-PPY supercapacitor.

**Method S3.** Calculation of the areal capacitance of CNPCF-PPY supercapacitor.

**Method S4.** Calculation of the areal energy density of CNPCF-PPY supercapacitor.

**Method S5.** Calculation of the area specific capacitance of CNPCF-PPY supercapacitor.

**Method S6.** Calculation of the area specific energy density of CNPCF-PPY supercapacitor.

**Method S7.** Calculation of the volumetric capacitance of CNPCF-PPY supercapacitor.

**Method S8.** Calculation of the volumetric energy density of CNPCF-PPY supercapacitor.

**Method S9.** Calculation of the volume specific capacitance of CNPCF-PPY supercapacitor.

**Method S10.** Calculation of the volume specific energy density of CNPCF-PPY supercapacitor.

**Method S11.** Calculation of the gravimetric capacitance of CNPCF-PPY supercapacitor.

**Method S12.** Calculation of the gravimetric energy density of CNPCF-PPY supercapacitor.

### Supplementary Figures:

**Fig. S1.** (a,b) SEM images of CNPs synthesized on CF at different magnifications.

**Fig. S2.** (a,b) TEM images of the tip portion of a CNP at different magnifications.

**Fig. S3.** (a) N<sub>2</sub> sorption isotherms and (b) BJH pore-size distribution curve of CNPs.

**Fig. S4.** TEM images of CNPCF-PPY-10 (a), CNPCF-PPY-20 (b), CNPCF-PPY-30 (c), CNPCF-PPY-40 (d), CNPCF-PPY-50 (e), CNPCF-PPY-60 (f) and CNPCF-PPY-120 (g) nanocomposites [inset shows their corresponding selected area electron diffraction (SAED) pattern].

**Fig. S5.** FTIR spectra of CNPCF and CNPCF-PPY nanocomposites.

**Fig. S6.** XPS high-resolution spectra of CNPCF-PPY nanocomposites. XPS de-convolution C 1s spectra (a-g) and N 1s spectra (h-n): CNPCF-PPY-10 (a,h), CNPCF-PPY-20 (b,i), CNPCF-PPY-30 (c,j), CNPCF-PPY-40 (d,k), CNPCF-PPY-50 (e,l), CNPCF-PPY-60 (f,m) and CNPCF-PPY-120 (g,n) nanocomposites.

**Fig. S7.** Nyquist plot near the high frequency region of CNPCF-PPY-40, CNPCF-PPY-50, CNPCF-PPY-60 and CNPCF-PPY-120 SCs.

**Fig. S8.** (a-c) N<sub>2</sub> sorption isotherms and (d-f) BJH pore-size distribution curve of CNPCF-PPY-40 (a,d), CNPCF-PPY-50 (b,e) and CNPCF-PPY-60 (c,f) nanocomposite.

**Fig. S9.** Plot of areal capacitance of CNPCF and CNPCF-PPY SC cells.

**Fig. S10.** Plot of areal energy density of CNPCF and CNPCF-PPY SC cells.

**Fig. S11.** Plot of volumetric capacitance of CNPCF and CNPCF-PPY SC cells.

**Fig. S12.** Plot of volumetric energy density of CNPCF and CNPCF-PPY SC cells.

**Fig. S13.** EPMA secondary electron image of CNPCF-PPY-50 nanocomposite electrode after completing 5000 charge/discharge cycles.

**Fig. S14.** EPMA 2D elemental mapping of CNPCF-PPY-50 nanocomposite electrode after completing 5000 charge/discharge cycles.

**Fig. S15.** XPS C 1s (a) and N 1s (b) de-convolution spectra of CNPCF-PPY-50 nanocomposite electrode after completing 5000 charge/discharge cycles.

## **Supplementary Methods:**

### **Method S1. Calculation of ionic conductivity of CNPCF-PPY nanocomposite electrodes.**

The ionic conductivity of the supercapacitor electrodes is calculated by using the equation

$$\sigma = \frac{T}{R_b \times A}$$

Where  $\sigma$  is the ionic conductivity in  $S\ cm^{-1}$ ,  $T$  is the total thickness of the supercapacitor cell (in cm),  $R_b$  is the bulk electrolyte resistance (in  $\Omega$ ), and  $A$  is the geometrical area of electrodes (in  $cm^2$ ).

### **Method S2. Calculation of the cell capacitance of CNPCF-PPY supercapacitor.**

The cell capacitance of the supercapacitor is calculated by using equation

$$C_{cell} = \frac{It_{dis}}{\Delta E}$$

Where,  $C_{cell}$  is the cell capacitance of the supercapacitor,  $I$  is the charging current,  $t_{dis}$  is the discharging time, and  $\Delta E$  is the operating potential window.

### **Method S3. Calculation of the areal capacitance of CNPCF-PPY supercapacitor.**

The areal capacitance of the supercapacitor is calculated by using the equation

$$C_{cell,A} = \frac{C_{cell}}{A_{cell}}$$

Where,  $C_{cell,A}$  is the areal capacitance of the supercapacitor, and  $A_{cell}$  is the total geometric area of two supercapacitor electrodes (i.e., two times the area of single electrode).

### **Method S4. Calculation of the areal energy density of CNPCF-PPY supercapacitor.**

The areal energy density ( $E_{cell,A}$ ) of the supercapacitor is calculated by using the equation

$$E_{cell,A} = \frac{C_{cell,A} \times (\Delta E)^2}{2 \times 3600}$$

### **Method S5. Calculation of the area specific capacitance of CNPCF-PPY supercapacitor.**

The area specific capacitance of the supercapacitor is calculated by using the equation

$$C_{cell,sp,A} = \frac{C_{cell}}{A_{ele}}$$

Where,  $C_{cell,sp,A}$  is the area specific capacitance of the supercapacitor and  $A_{ele}$  is the geometric area of the supercapacitor electrode.

**Method S6. Calculation of the area specific energy density of CNPCF-PPY supercapacitor.**

The area specific energy density ( $E_{\text{cell,sp,A}}$ ) of the supercapacitor is calculated by using the equation

$$E_{\text{cell,sp,A}} = \frac{C_{\text{cell,sp,A}} \times (\Delta E)^2}{2 \times 3600}$$

**Method S7. Calculation of the volumetric capacitance of CNPCF-PPY supercapacitor.**

The volumetric capacitance of the supercapacitor is calculated by using the equation

$$C_{\text{cell,V}} = \frac{C_{\text{cell}}}{V_{\text{cell}}}$$

Where,  $C_{\text{cell,V}}$  is the volumetric capacitance of the supercapacitor and  $V_{\text{cell}}$  is the total volume of the supercapacitor.

**Method S8. Calculation of the volumetric energy density of CNPCF-PPY supercapacitor.**

The volumetric energy density ( $E_{\text{cell,V}}$ ) of the supercapacitor is calculated by using the equation

$$E_{\text{cell,V}} = \frac{C_{\text{cell,V}} \times (\Delta E)^2}{2 \times 3600}$$

**Method S9. Calculation of the volume specific capacitance of CNPCF-PPY supercapacitor.**

The volume specific capacitance of the supercapacitor is calculated by using the equation

$$C_{\text{cell,sp,V}} = \frac{C_{\text{cell}}}{V_{\text{ele}}}$$

Where,  $C_{\text{cell,sp,V}}$  is the volume specific capacitance of the supercapacitor and  $V_{\text{ele}}$  is the total volume of the supercapacitor electrodes.

**Method S10. Calculation of the volume specific energy density of CNPCF-PPY supercapacitor.**

The volume specific energy density ( $E_{\text{cell,sp,V}}$ ) of the supercapacitor is calculated by using the equation

$$E_{\text{cell,sp,V}} = \frac{C_{\text{cell,sp,V}} \times (\Delta E)^2}{2 \times 3600}$$

**Method S11. Calculation of the gravimetric capacitance of CNPCF-PPY supercapacitor.**

The gravimetric capacitance ( $C_m$ ) of the supercapacitor is calculated by using the equation

$$C_m = \frac{I \times t_{\text{dis}}}{m \times (\Delta E)} = \frac{C_{\text{cell}}}{m}$$

Where, 'm' is the total mass of electro-active materials (both CNP and PPY) in the two electrodes of the supercapacitor (excluding the mass of CF, separator, and electrolyte) and other variables are discussed above.

**Method S12. Calculation of the gravimetric energy density of CNPCF-PPY supercapacitor.**

The gravimetric energy density ( $E_m$ ) of the supercapacitor is calculated by using the equation

$$E_m = \frac{C_m \times (\Delta E)^2}{2 \times 3600}$$

**Supplementary Figures:**

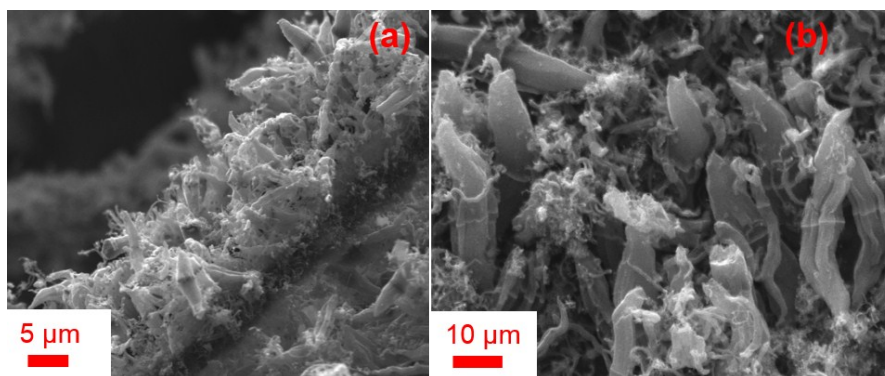

**Fig. S1.** (a,b) SEM images of CNPs synthesized on CF at different magnifications.

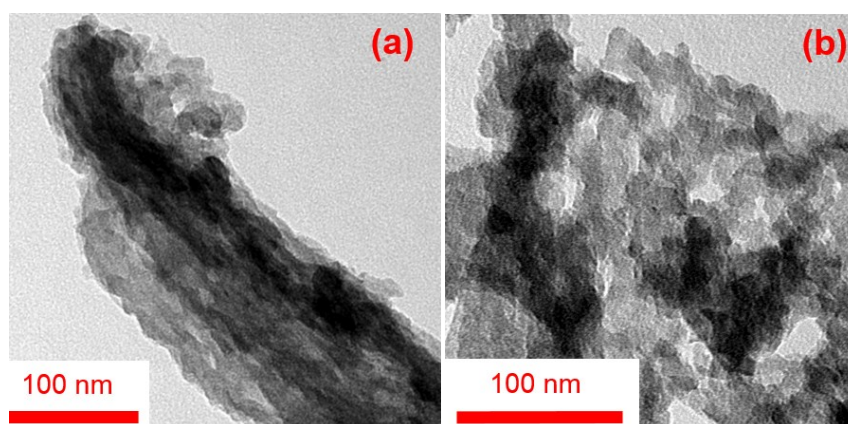

**Fig. S2.** (a,b) TEM images of the tip portion of a CNP at different magnifications.

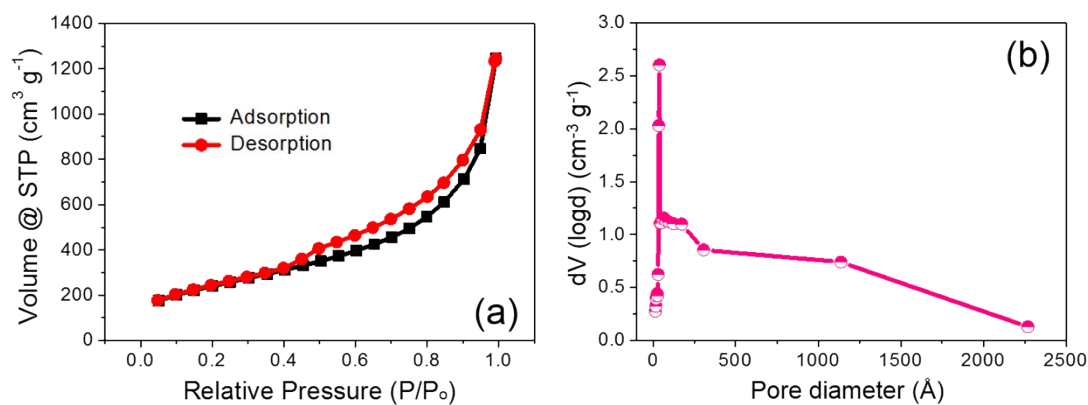

**Fig. S3.** (a) N<sub>2</sub> sorption isotherms and (b) BJH pore-size distribution curve of CNPs.

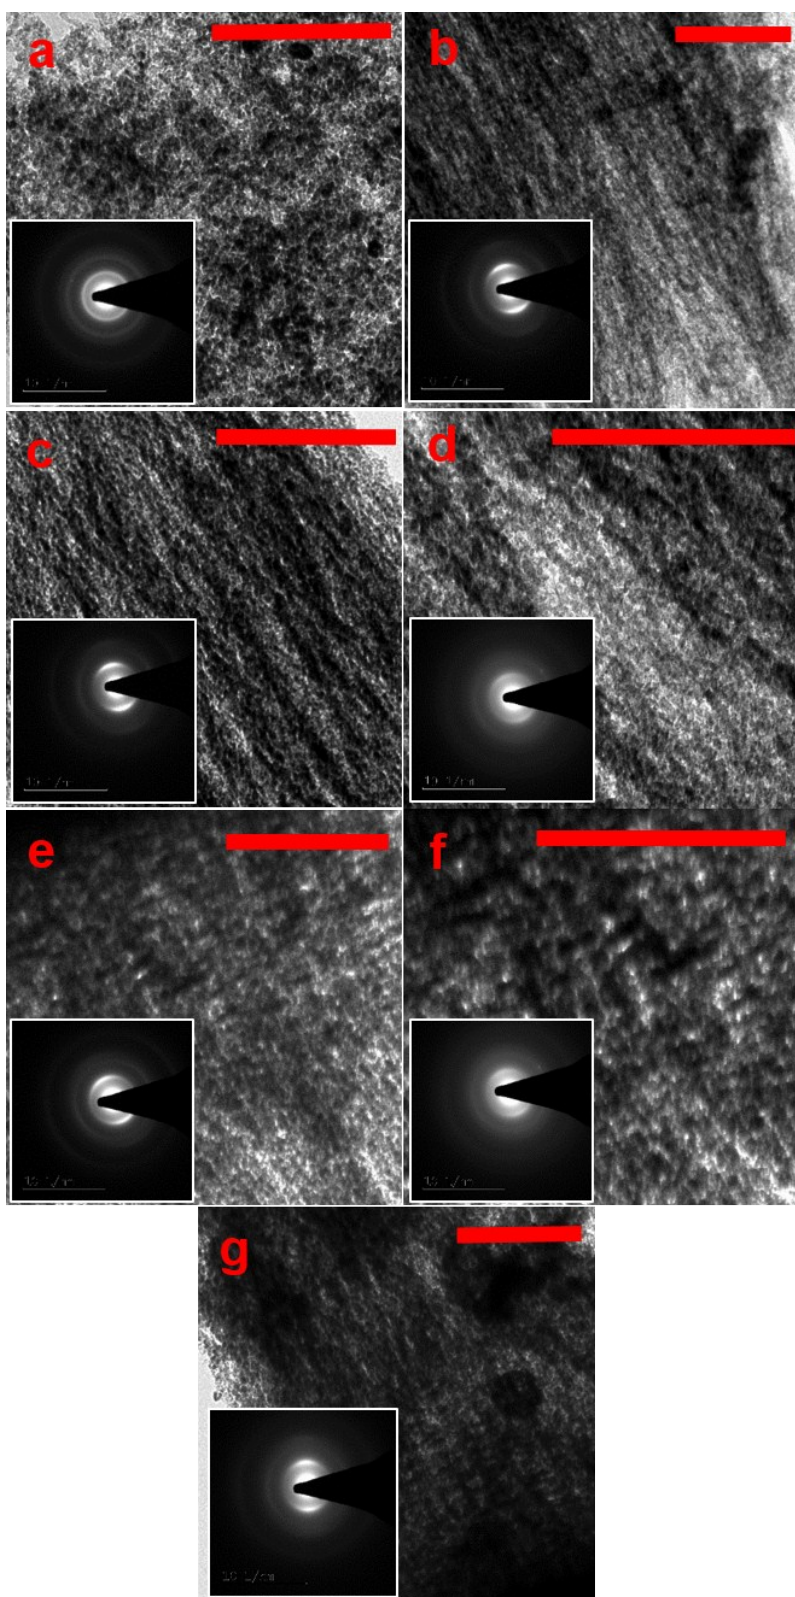

**Fig. S4.** TEM images of CNPCF-PPY-10 (a), CNPCF-PPY-20 (b), CNPCF-PPY-30 (c), CNPCF-PPY-40 (d), CNPCF-PPY-50 (e), CNPCF-PPY-60 (f) and CNPCF-PPY-120 (g) nanocomposites [inset shows their corresponding selected area electron diffraction (SAED) pattern].

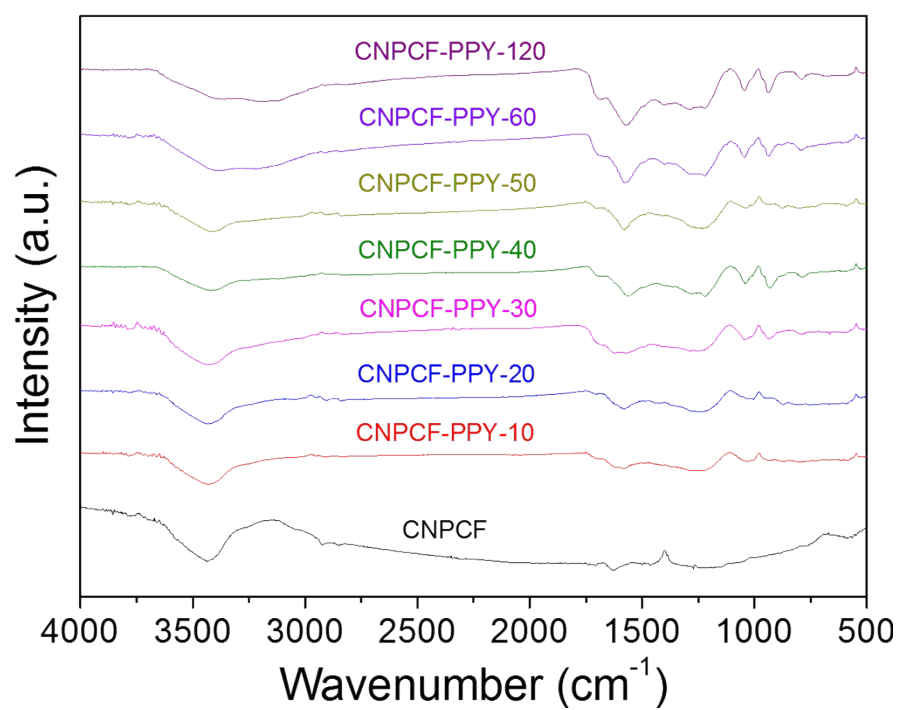

**Fig. S5.** FTIR spectra of CNPCF and CNPCF-PPY nanocomposites.

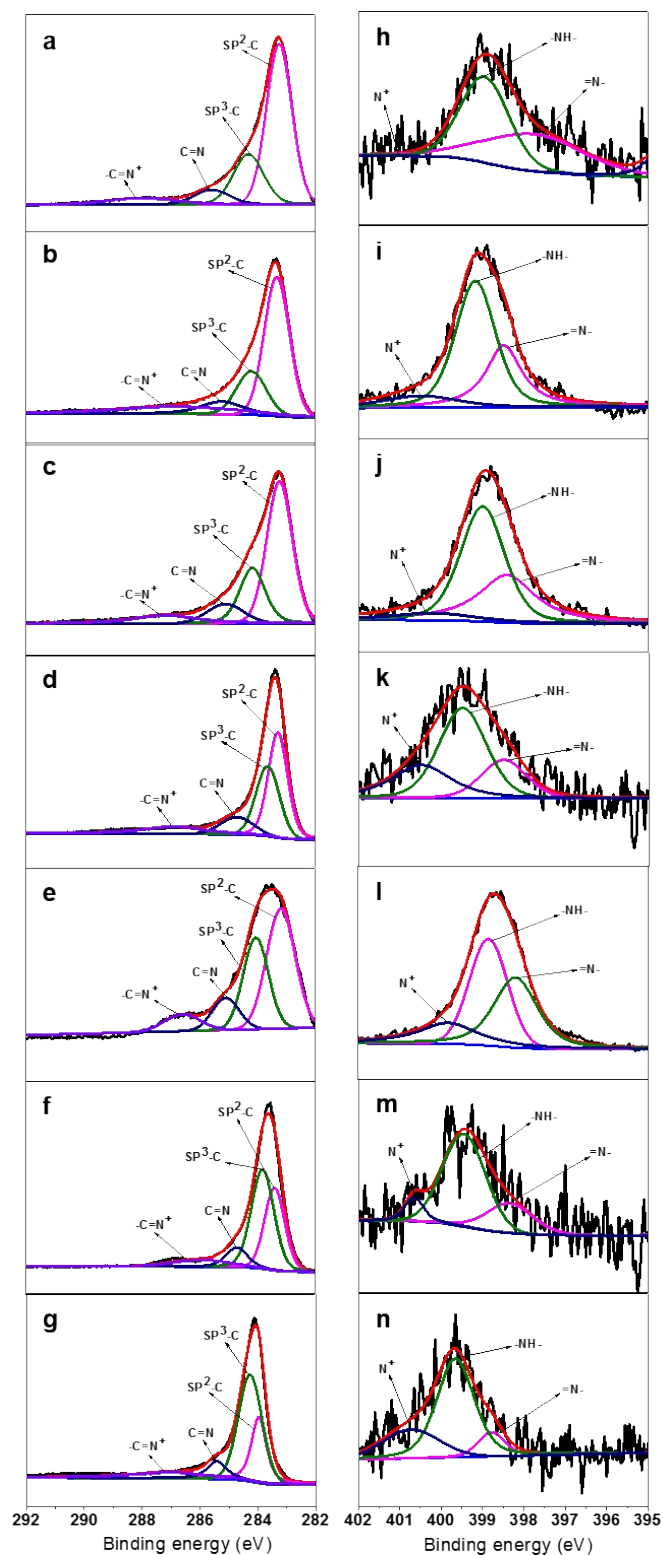

**Fig. S6.** XPS high-resolution spectra of CNPCF-PPY nanocomposites. XPS de-convolution C 1s spectra (a-g) and N 1s spectra (h-n): CNPCF-PPY-10 (a,h), CNPCF-PPY-20 (b,i), CNPCF-PPY-30 (c,j), CNPCF-PPY-40 (d,k), CNPCF-PPY-50 (e,l), CNPCF-PPY-60 (f,m) and CNPCF-PPY-120 (g,n) nanocomposites.

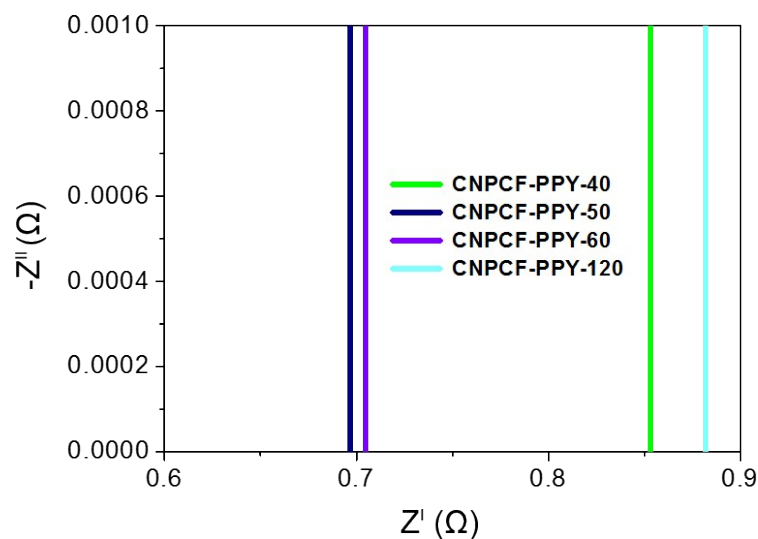

**Fig. S7.** Nyquist plot near the high frequency region of CNPCF-PPY-40, CNPCF-PPY-50, CNPCF-PPY-60 and CNPCF-PPY-120 SCs.

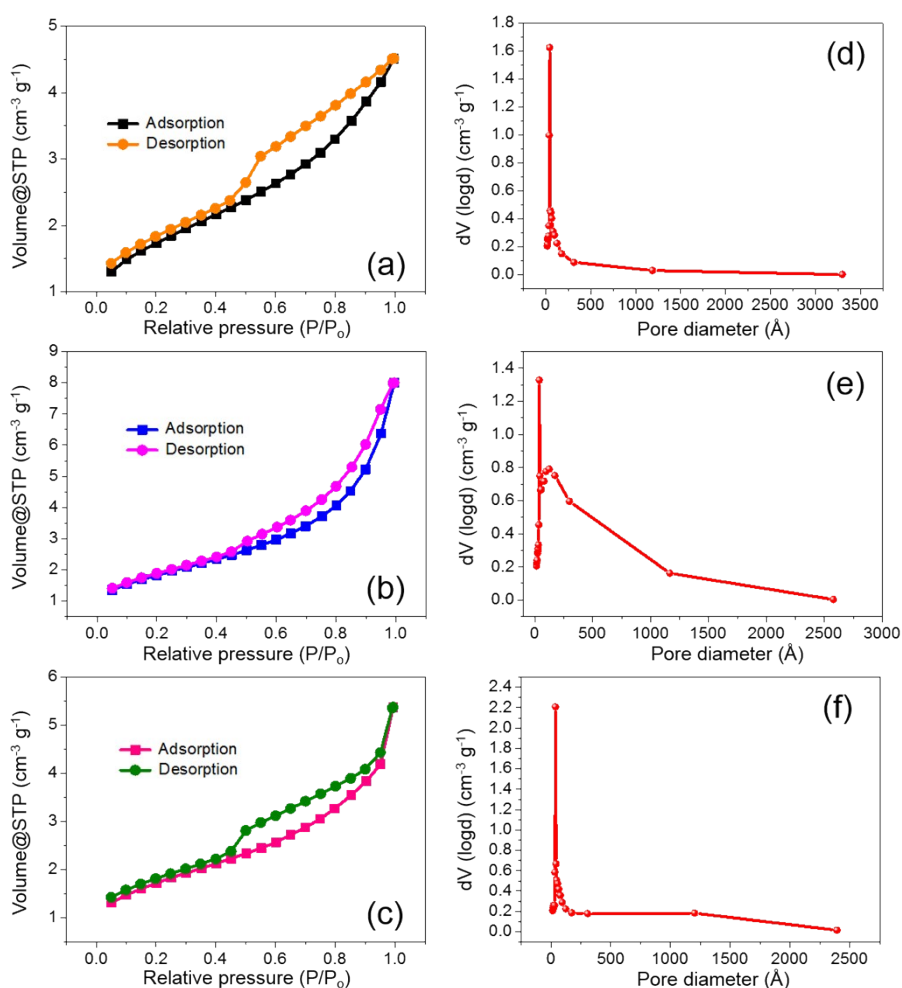

**Fig. S8.** (a-c)  $N_2$  sorption isotherms and (d-f) BJH pore-size distribution curve of CNPCF-PPY-40 (a,d), CNPCF-PPY-50 (b,e) and CNPCF-PPY-60 (c,f) nanocomposite.

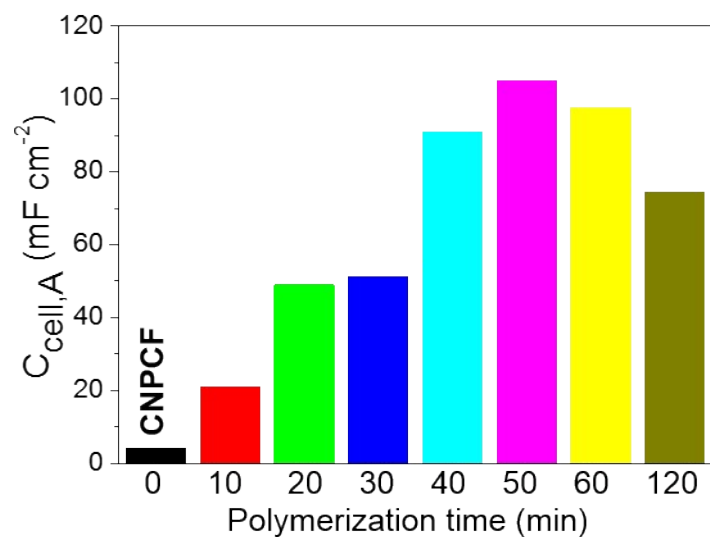

**Fig. S9.** Plot of areal capacitance of CNPCF and CNPCF-PPY SC cells.

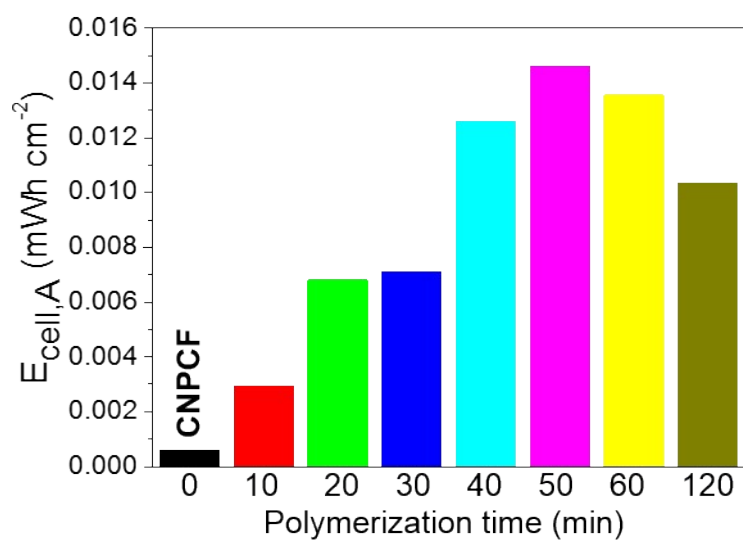

**Fig. S10.** Plot of areal energy density of CNPCF and CNPCF-PPY SC cells.

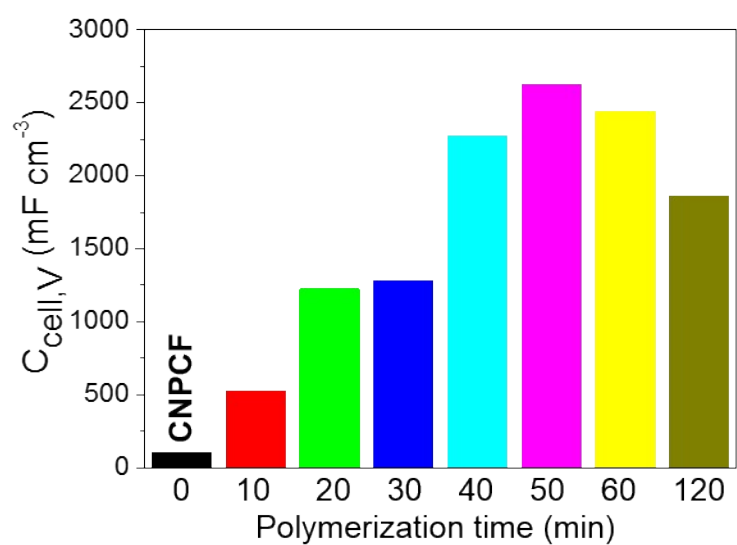

**Fig. S11.** Plot of volumetric capacitance of CNPCF and CNPCF-PPY SC cells.

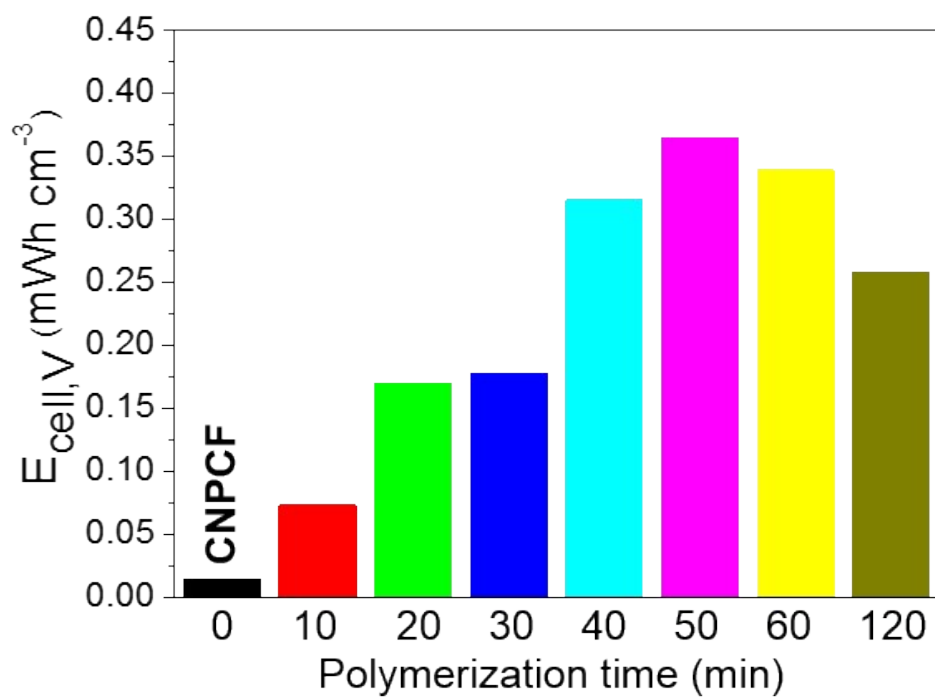

**Fig. S12.** Plot of volumetric energy density of CNPCF and CNPCF-PPY SC cells.

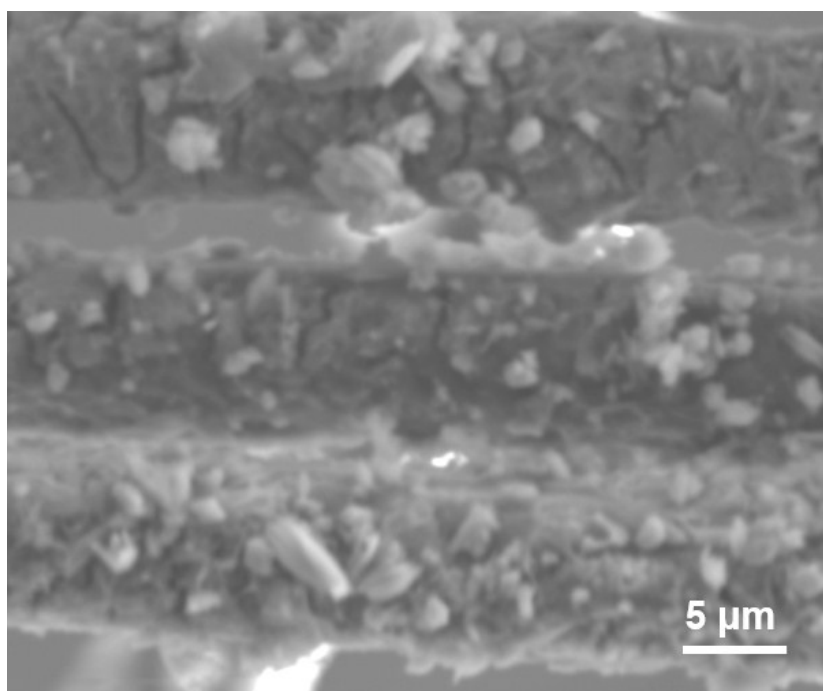

**Fig. S13.** EPMA secondary electron image of CNPCF-PPY-50 nanocomposite electrode after completing 5000 charge/discharge cycles.

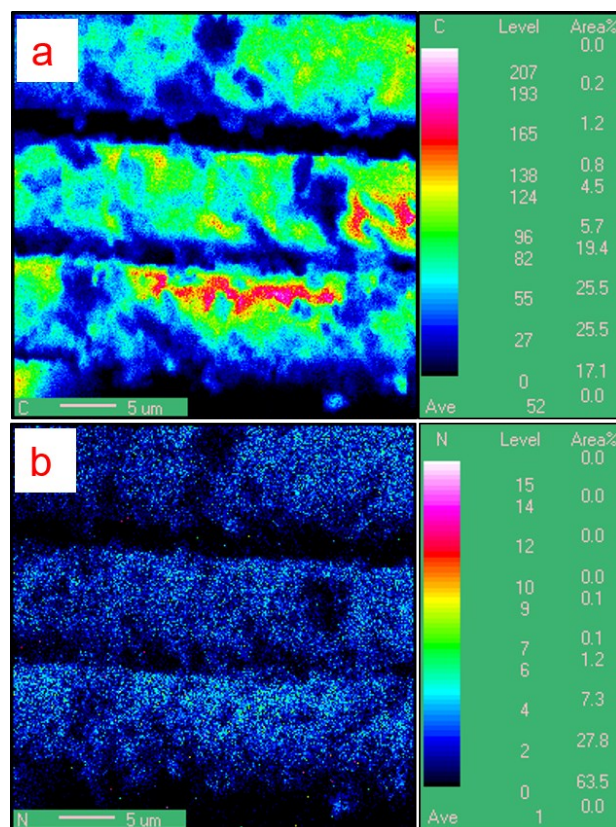

**Fig. S14.** EPMA 2D elemental mapping of CNPCF-PPY-50 nanocomposite electrode after completing 5000 charge/discharge cycles.

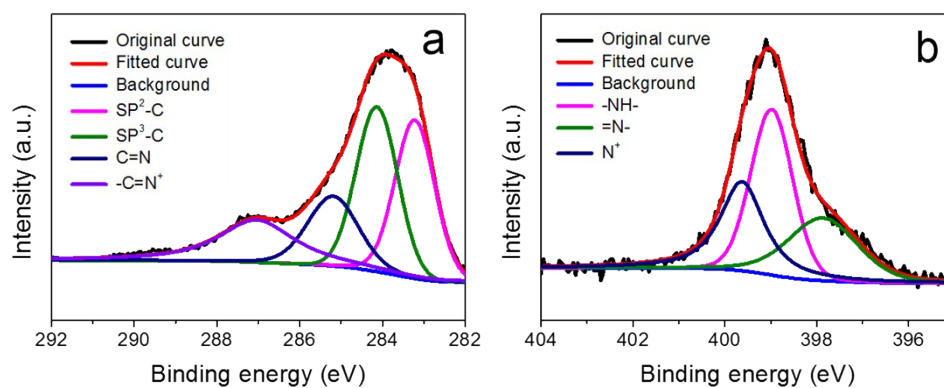

**Fig. S15.** XPS C 1s (a) and N 1s (b) de-convolution spectra of CNPCF-PPY-50 nanocomposite electrode after completing 5000 charge/discharge cycles.
